# Supplementary material for: Correlation between structure and photovoltaic performance of a series of furan bridged donor–acceptor conjugated polymers
Source: Royal Society of Chemistry journal article supplement (doi:10.1039/c3ta12210g), 2013-01-01
Supplement: c3ta12210g.pdf [file c3ta12210g.pdf]

## Supporting informations

### Correlation between Structure and Photovoltaic Performance of a Series of Furan Bridged Donor-Acceptor Conjugated Polymers

Jianyu Yuan, Zhichun Zhai, Jing Li, Jialing Lu, Xiaodong Huang, Zhongjie Xu, Wanli Ma\*

Institute of Functional Nano & Soft Materials (FUNSOM), Jiangsu Key Laboratory for Carbon-Based Functional Materials & Devices, Soochow University, 199 Ren'ai Road, Suzhou 215123, China; E-mail: [wlma@suda.edu.cn](mailto:wlma@suda.edu.cn)

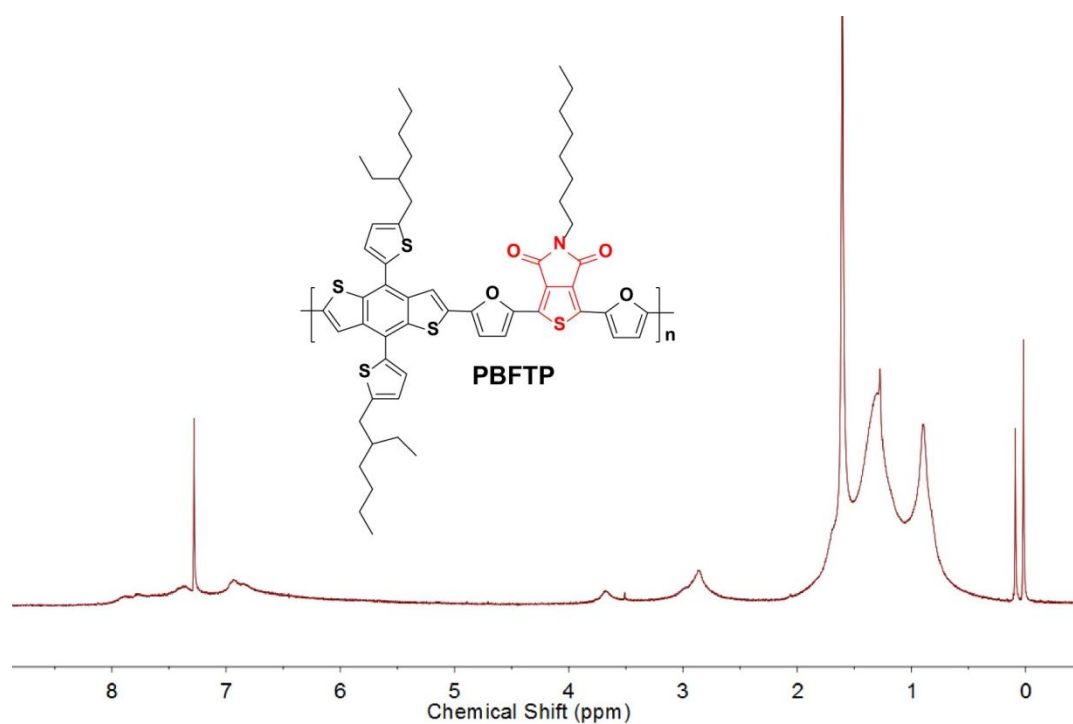

**Figure S1.** 400 MHz  $^1\text{H}$  NMR spectra of **PBFTP** in  $d\text{-CDCl}_3$

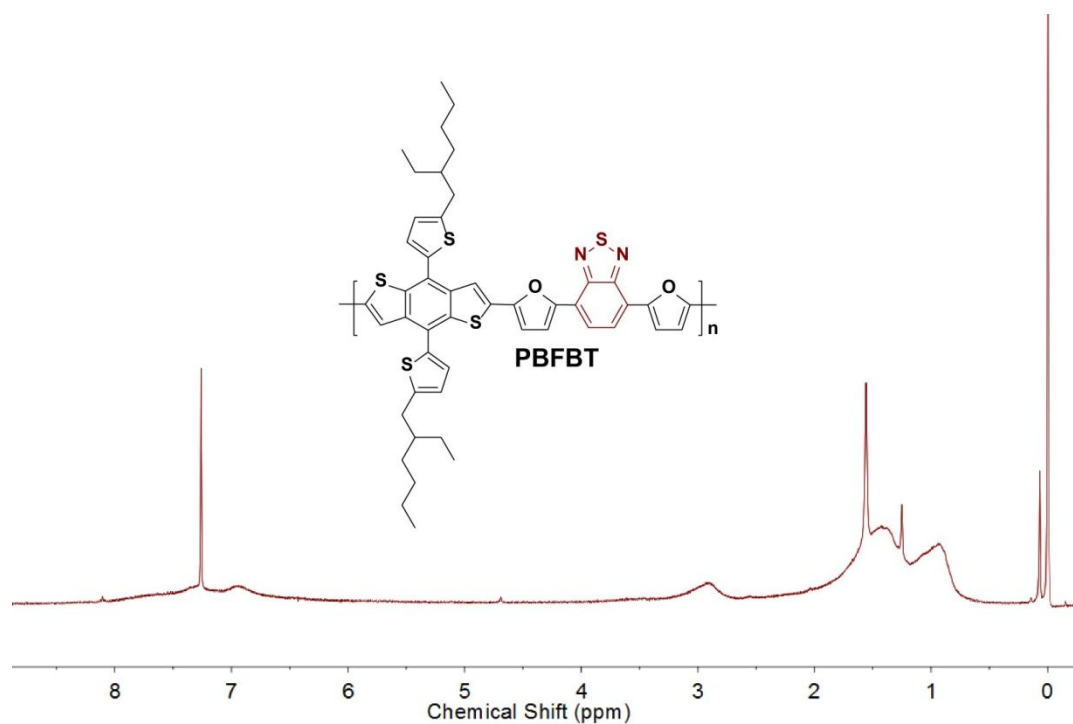

**Figure S2.** 400 MHz <sup>1</sup>H NMR spectra of **PFBFT** in *d*-CDCl<sub>3</sub>

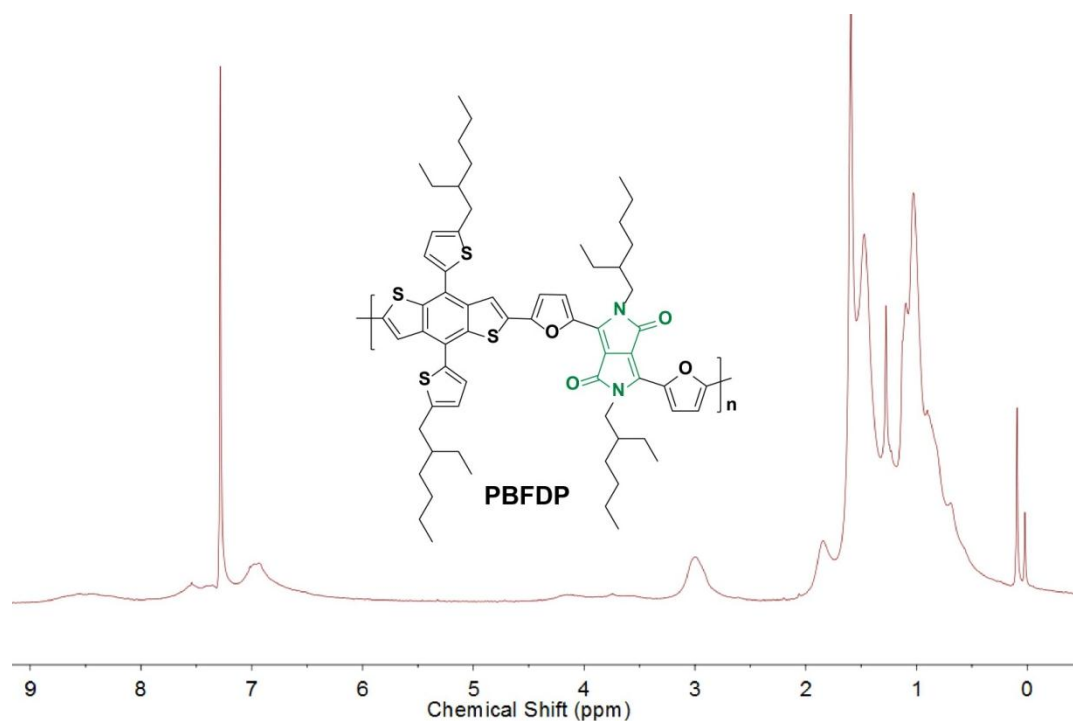

**Figure S3.** 400 MHz <sup>1</sup>H NMR spectra of **PBFDP** in *d*-CDCl<sub>3</sub>
